# Supplementary material for: Structural organization and sequence diversity of the complete nucleotide sequence encoding the Plasmodium malariae merozoite surface protein-1
Source: PubMed Central journal article supplement (PMC9481586; doi:10.1038/s41598-022-19049-z), 2022-09-16

# Structural organization and sequence diversity of the complete nucleotide sequence encoding the *Plasmodium malariae* merozoite surface protein-1

Chaturong Putaporntip<sup>1\*</sup>, Napaporn Kuamsab<sup>1,2</sup>, Rattanaporn Rojrung<sup>1</sup>, Sunee Seethamchai<sup>3</sup>, Somchai Jongwutiwes<sup>1\*\*\*</sup>

<sup>1</sup>Molecular Biology of Malaria and Opportunistic Parasites Research Unit, Department of Parasitology, Faculty of Medicine, Chulalongkorn University, Bangkok; <sup>2</sup>Cannabis Health Sciences, College of Allied Health Sciences, Suan Sunandha Rajabhat University, Samut Songkhram Province; <sup>3</sup>Department of Biology, Faculty of Science, Naresuan University, Pitsanulok Province, Thailand.

## SUPPLEMENTAL INFORMATION

### Contents

|                                                                                                                                                                                                                                                               |    |
|---------------------------------------------------------------------------------------------------------------------------------------------------------------------------------------------------------------------------------------------------------------|----|
| Table S1. Sequencing primers for <i>PmMSP1</i> .....                                                                                                                                                                                                          | 2  |
| Table S2. Haplotype and nucleotide diversity in the <i>MSP1</i> genes of <i>P. malariae</i> , <i>P. ovale curtisi</i> , <i>P. ovale wallikeri</i> , <i>P. knowlesi</i> , <i>P. vivax</i> and <i>P. falciparum</i> from diverse endemic areas of Thailand..... | 3  |
| Figure S1. Amino acid substitutions in the putative 42 KDa- and 19 KDa-fragments of PmMSP1 relative to the two parental strains of PfMSP1 (MAD20 and K1).....                                                                                                 | 4  |
| Figure S2. Predicted common Thai HLA-class II-binding peptides in PmMSP1.....                                                                                                                                                                                 | 5  |
| Figure S3. Schematic representation of malarial MSP1s, depicting homologous regions.....                                                                                                                                                                      | 9  |
| Figure S4. Quasi-palindromic sequences around the insertion/deletion region at the 3' portion of <i>PmMSP1</i> and <i>PvMSP1</i> .....                                                                                                                        | 10 |

**Supplemental Table S1** Sequencing primers for *PmMSP1*

| Primer Name | Sequence (5' → 3')           | Direction | Positions after GenBank no. FJ824669 |
|-------------|------------------------------|-----------|--------------------------------------|
| PmMSP1-F1   | CTATATTATCAAGTTTAATTCAAA     | Forward   | (-25) – (-2)                         |
| PmMSP1-F2   | TTGCTCGACGAAATAAAGGAAATTG    | Forward   | 844 - 868                            |
| PmMSP1-F3   | CGGAACAGGAGAACAATCCGAAC      | Forward   | 1863 - 1885                          |
| PmMSP1-F4   | GAAACTCAGGAAATTGGAATCGTT     | Forward   | 2515 - 2538                          |
| PmMSP1-F5   | ACAAGCAGTACTAATCATATTAAG     | Forward   | 3436 - 3460                          |
| PmMSP1-F6   | TCAATTTAAACATGCAACTTC        | Forward   | 4350 - 4370                          |
| PmMSP1-R1   | ATCCTTCTTTTCTGTCTTTTTTTC     | Reverse   | 1 - 24                               |
| PmMSP1-R2   | TCAACATCTAATAGTTTATACG       | Reverse   | 4394 - 4415                          |
| PmMSP1-R3   | ATTTTCAACTTCTTTCTTTTCTGC     | Reverse   | 3565 - 3588                          |
| PmMSP1-R4   | TTGATATGACACACATAAGCAGT      | Reverse   | 2593 - 2615                          |
| PmMSP1-R5   | CTTGATTTTTTCTTCCTCCAGTTTTTTC | Reverse   | 1968 - 1995                          |
| PmMSP1-R6   | ATCTGTAAATAGACCATCCAT        | Reverse   | 1006 - 1026                          |

**Supplemental Table S2** Haplotype and nucleotide diversity in the *MSP1* genes of *P. malariae*, *P. ovale curtisi*, *P. ovale wallikeri*, *P. knowlesi*, *P. vivax* and *P. falciparum* from diverse endemic areas of Thailand

| Gene           | n   | H   | $h \pm \text{S.D.}$ | $\pi \pm \text{S.E.}$ | $\pi_S \pm \text{S.E.}$ | $\pi_N \pm \text{S.E.}$ | References |
|----------------|-----|-----|---------------------|-----------------------|-------------------------|-------------------------|------------|
| <i>PmMSP1</i>  | 35  | 20  | $0.941 \pm 0.021$   | $0.01135 \pm 0.00136$ | $0.01014 \pm 0.00151$   | $0.01166 \pm 0.00116$   | This study |
| <i>PocMSP1</i> | 5   | 3   | $0.700 \pm 0.218$   | $0.00129 \pm 0.00040$ | $0.00124 \pm 0.00081$   | $0.00129 \pm 0.00038$   | 1          |
| <i>PowMSP1</i> | 5   | 4   | $0.900 \pm 0.161$   | $0.00024 \pm 0.00015$ | $0.00074 \pm 0.00056$   | $0.00010 \pm 0.00010$   | 1          |
| <i>PkMSP1</i>  | 12  | 10  | $0.970 \pm 0.044$   | $0.04532 \pm 0.00251$ | $0.05475 \pm 0.00442$   | $0.04251 \pm 0.00207$   | 2          |
| <i>PvMSP1</i>  | 207 | 108 | $0.930 \pm 0.015$   | $0.04842 \pm 0.00172$ | $0.05699 \pm 0.00423$   | $0.04594 \pm 0.00245$   | 3, 4       |
| <i>PfMSP1</i>  | 80  | 24  | $0.890 \pm 0.025$   | $0.04569 \pm 0.00699$ | $0.05139 \pm 0.00303$   | $0.04192 \pm 0.00161$   | 5-7        |

n, number of taxon; H, number of haplotypes;  $h$ , haplotype diversity;  $\pi$ , nucleotide diversity,  $\pi_S$ , nucleotide diversity at synonymous site; and  $\pi_N$ , nucleotide diversity at nonsynonymous site.

Z-tests of the hypothesis that  $\pi$ ,  $\pi_S$  or  $\pi_N$  in *PmMSP1* equals the corresponding value in *PocMSP1*, *PocMSP1*, *PkMSP1*, *PvMSP1* or *PfMSP1*: all  $p$  values  $< 0.00001$ .

Z-tests of the hypothesis that  $\pi$ ,  $\pi_S$  or  $\pi_N$  in *PkMSP1* equals the corresponding value in *PvMSP1* or *PfMSP1*: all  $p$  values  $> 0.05$ .

#### References:

1. Putaporntip, C., Hughes, A.L. & Jongwutiwes, S. Low level of sequence diversity at merozoite surface protein-1 locus of *Plasmodium ovale curtisi* and *P. ovale wallikeri* from Thai isolates. *PLoS One* **8**, e58962 (2013).
2. Putaporntip, C., Thongaree, S. & Jongwutiwes, S. Differential sequence diversity at merozoite surface protein-1 locus of *Plasmodium knowlesi* from humans and macaques in Thailand. *Infect. Genet. Evol.* **18**, 213-9 (2013).
3. Putaporntip, C. *et al.* Mosaic organization and heterogeneity in frequency of allelic recombination of the *Plasmodium vivax* merozoite surface protein-1 locus. *Proc. Natl. Acad. Sci. USA.* **99**, 16348-16353 (2002).
4. Jongwutiwes, S., Putaporntip, C. & Hughes, A.L. Bottleneck effects on vaccine-candidate antigen diversity of malaria parasites in Thailand. *Vaccine* **28**, 3112-7 (2010).
5. Tanabe, K. *et al.* Allelic dimorphism-associated restriction of recombination in *Plasmodium falciparum msp1*. *Gene* **397**, 153-160 (2007).
6. Tanabe, K. *et al.* Within-population genetic diversity of *Plasmodium falciparum* vaccine candidate antigens reveals geographic distance from a Central sub-Saharan African origin. *Vaccine* **31**, 1334-1339 (2013).
7. Tanabe, K. *et al.* *Plasmodium falciparum*: Genetic diversity and complexity of infections in a isolated village in Western Thailand. *Parasitol. Int.* **64**, 260-266 (2015).

**Supplemental Figure S1.** Amino acid substitutions in the putative 42 KDa- and 19 KDa-fragments of PmMSP1 relative to the two parental strains of PfMSP1 (MAD20 and K1).

|                          |            |             |            |            |            |            |            |            |             |            |            |         |       |            |       |       |         |         |         |       |            |            |            |       |
|--------------------------|------------|-------------|------------|------------|------------|------------|------------|------------|-------------|------------|------------|---------|-------|------------|-------|-------|---------|---------|---------|-------|------------|------------|------------|-------|
| PfMSP1-MAD20             | NKKVNEALKS | YENFLPEAK-  | VTTVVTTPQP | DVTPSPLSVR | VSGSSGSTKE | ETQIPTSGSL | LTELQQVVQL | QNYDEEDDSL | VVLPIFGESE  | DNDEYLDQVV | 1304       |         |       |            |       |       |         |         |         |       |            |            |            |       |
| PfMSP1-K1                | NTDVNNALES | YKKFLPEGTD  | VATVSE---  | -----      | -SGSDTLEQS | QPKKPASTHV | GAESNTITTS | QNVDEVDV   | IIVPIFGESE  | EDYDDLQVV  | 1251       |         |       |            |       |       |         |         |         |       |            |            |            |       |
| PmMSP1                   | NEEVNKALNV | YEELLPK---  | --QISTEEQP | D-----     | NAL        | ADGTENATEG | AEVRAATAES | LVQGE----  | DEYPPEEVDEV | IVFPVIGKKE | KE-NPLDQIT | 1377    |       |            |       |       |         |         |         |       |            |            |            |       |
| variants                 | .....      | .....       | ---K.      | .....      | .....      | .....      | .....      | .....      | .....       | .....      | .....      |         |       |            |       |       |         |         |         |       |            |            |            |       |
| <b>← 42 KDa fragment</b> |            |             |            |            |            |            |            |            |             |            |            |         |       |            |       |       |         |         |         |       |            |            |            |       |
| PfMSP1-MAD20             | TGEAISVT-M | DNILSGFENE  | YDVIYLKPLA | GVYRSLKKQI | EKNIITFNLN | LNDILNSRLK | KRKYFLDVLE | SDLMQFKHIS | SNEYIIEDSF  | KLLNSEQKNT | 1403       |         |       |            |       |       |         |         |         |       |            |            |            |       |
| PfMSP1-K1                | TGEAVTPSVI | DNILSKIENE  | YEVLYLKPLA | GVYRSLKKQL | ENNVMTFNVN | VKDILNSRFN | KRENFKNVLE | SDLIPYKDLT | SSNYVVKDPY  | KFLNKEKRDK | 1351       |         |       |            |       |       |         |         |         |       |            |            |            |       |
| PmMSP1                   | KGQAETKQ-D | DNILKPIITNE | YEVLYIKPLA | GVYRVLKQI  | GDQIDAFNSN | LTNALDTRKK | KRTYFLDVLN | SDLIQFKHAT | SDSYIIKDPY  | KLLDVDKKAK | 1476       |         |       |            |       |       |         |         |         |       |            |            |            |       |
| variants                 | .....      | .....       | .....      | .....      | .....      | .....      | .....      | .....      | .....       | .....      | .....      |         |       |            |       |       |         |         |         |       |            |            |            |       |
| PfMSP1-MAD20             | LLKSYKYIKE | SVENDIKFAQ  | EGISYIEKVL | AKYKDDLESI | KKVIKEEKEK | FPSSPPTTPP | SPAKTDEQKK | ESKFLPFLT  | IETLYNNLVN  | KIDDYLINLK | 1503       |         |       |            |       |       |         |         |         |       |            |            |            |       |
| K PfMSP1-K1              | FLSSYNYIKD | SIDTDINFAN  | DVLGYKILS  | EKYKSDLDSI | KKYI-----  | -----      | ----NDKQGE | NEKYLPLLN  | IETLYKTVD   | KIDLFVIHLE | 1431       |         |       |            |       |       |         |         |         |       |            |            |            |       |
| PmMSP1                   | LIGSYKYIVS | AIEKDITSAE  | NGVEYDKMT  | KLYKTQLEAV | KSAAEAQKE  | -----      | ----GDKKTE | NEKYIPFLT  | MOTLYENLLN  | KINGNIINLK | 1562       |         |       |            |       |       |         |         |         |       |            |            |            |       |
| variants                 | .....      | .....       | K.....     | .....      | .....      | -----      | ----.....  | .....      | .....       | .....      | .....      |         |       |            |       |       |         |         |         |       |            |            |            |       |
| <b>← 19 KDa fragment</b> |            |             |            |            |            |            |            |            |             |            |            |         |       |            |       |       |         |         |         |       |            |            |            |       |
| PfMSP1-MAD20             | AKINDCNVEK | DEAHVKITKL  | SDLKAIDDKI | DLFKNTNDFE | AIKKLINDDT | KKDMLGKLLS | TGLV-QNFPN | TIISKLIEGK | FQDMLNIS-Q  | HQC        | VKKQ       | CPE     | 1601  |            |       |       |         |         |         |       |            |            |            |       |
| PfMSP1-K1                | AKVLNYTYEK | SNVEVKIKEL  | NYLKTIQDKL | ADFKKNNFV  | GIADLSTDYN | HNNLLTKFLS | TGMVFENLAK | TVLSNLLDGN | LQGMLNIS-Q  | HQC        | VKKQ       | CPQ     | 1530  |            |       |       |         |         |         |       |            |            |            |       |
| PmMSP1                   | TLITNCNLEK | DAVNITISKL  | TEYSKFDEKI | EMFKNSKN-- | -----      | EKDIA      | SSGILDILKQ | KGLVNKNEST | KIISELLGVD  | SNALLNISAK | HAC        | TETKYPE | 1655  |            |       |       |         |         |         |       |            |            |            |       |
| variants                 | .....      | .....       | D.....     | .....      | -----      | .....      | .....      | .....      | .....       | .....      | .....      | .....   | ..... |            |       |       |         |         |         |       |            |            |            |       |
| PfMSP1-MAD20             | NSG        | CFRHLDE     | REE        | CK         | CLLNY      | KQEGDK     | CVEN       | PNPT       | CNENNG      | G          | CADAT      | C       | TE    | EDSGSSRKKI | T     | C     | CTKPDSY | PLFDGIF | C       | SS    | SNFLGISFLL | ILMLILYSFI | 1701       |       |
| PfMSP1-K1                | NSG        | CFRHLDE     | REE        | CK         | CLLNY      | KQEGDK     | CVEN       | PNPT       | CNENNG      | G          | CADAK      | C       | TE    | EDSGSNGKKI | T     | C     | CTKPDSY | PLFDGIF | C       | SS    | SNFLGISFLL | ILMLILYSFI | 1630       |       |
| PmMSP1                   | NAG        | CYRYEDG     | KEVWR      | CLLNY      | KLVDGG     | CVED       | EEPS       | CQVNNG     | G           | CAPEAN     | C          | TK      | GDD   | ----       | NKI   | V     | CAC     | NAPYSE  | PIFEGVF | C     | GS         | SSFLGLSLLL | AALLIMFNLL | 1751  |
| variants                 | .....      | .....       | .....      | .....      | .....      | E..D.      | V..K.      | .....      | .....       | .....      | .....      | .....   | ..... | .....      | ..... | ..... | .....   | .....   | .....   | ..... | .....      | .....      | .....      | ..... |

Note: GenBank accession numbers are X05624, X03371 and FJ824669 for PfMSP1 (MAD20 and K1 strains) and PmMSP1 (Cameroon strain). Variants include 35 Thai PmMSP1 sequences (GenBank accession nos. OM525734- OM525768). Dots represent identical residues with PmMSP1 (FJ82669). Dashes are deletions. Cysteine residues forming epidermal growth factor (EGF)-like domains 1 and 2 are highlighted in red and blue residues, respectively. Positively and negatively selected amino acids are highlighted in black and green, respectively. Amino acid positions are shown on the right.



```

ITEEEGKINA LKGDVDSKLE KFKKIEGEFK PLEKIFYDER LDNSITTENF EKFLSKRTEY LITEKNLLESS SYELSKALVK KLKKQLMYLE DYSLRKEVFD EEVNHFNCLD 550
*****
DRB1*12:02
DRB1*15:02
DQA1*01:01/DQB1*03:01
DQA1*01:01/DQB1*03:03
DQA1*01:02/DQB1*03:01
DQA1*01:02/DQB1*03:03
DQA1*03:02/DQB1*03:01
DQA1*03:02/DQB1*03:03
DQA1*06:01/DQB1*03:01
DQA1*06:01/DQB1*03:03
DQA1*06:01/DQB1*05:01
DQA1*06:01/DQB1*05:02
*****

```

```

LQLNADIHKL ESEIKRKENL LTVVDTLKFS DVVELOVQKV LLGKKIGQLK NVEAFLQAK LKETFHPIQA YGTGEQSEPY YLIALKREID KLNISIPKIE EMLKNEKKLE 660
*****
DRB1*12:02
DRB1*15:02
DQA1*01:01/DQB1*03:01
DQA1*01:01/DQB1*03:03
DQA1*01:02/DQB1*03:01
DQA1*01:02/DQB1*03:03
DQA1*03:02/DQB1*03:01
DQA1*03:02/DQB1*03:03
DQA1*06:01/DQB1*03:01
DQA1*06:01/DQB1*03:03
DQA1*06:01/DQB1*05:01
DQA1*06:01/DQB1*05:02
*****

```

→← Block VI

```

EEKIKAAAQN VSGHVSAGE TSNHSGSSGG GGSTQIVTIT PSTITITAITTS SQIVSVGETG SAQAQAQPOP QPQPQPQTQT QTQTQPQAAG ATGTPQSGGQ SGQSGQSGAE 770
*****
DRB1*12:02
DRB1*15:02
DQA1*01:01/DQB1*03:01
DQA1*01:01/DQB1*03:03
DQA1*01:02/DQB1*03:01
DQA1*01:02/DQB1*03:03
DQA1*03:02/DQB1*03:01
DQA1*03:02/DQB1*03:03
DQA1*06:01/DQB1*03:01
DQA1*06:01/DQB1*03:03
DQA1*06:01/DQB1*05:01
DQA1*06:01/DQB1*05:02
*****

```

→← Block VII

```

GITETITGITG QAGITGITEPQ AAAAGPQAEI TATPGQAGAA GAAGPQAEIT GTPGQAGAAG PQTETEVEET QEIGIVVPTL SKLQYLEKLY DFLKTAYVCH INILVNNSTM 880
*****
DRB1*12:02
DRB1*15:02
DQA1*01:01/DQB1*03:01
DQA1*01:01/DQB1*03:03
DQA1*01:02/DQB1*03:01
DQA1*01:02/DQB1*03:03
DQA1*03:02/DQB1*03:01
DQA1*03:02/DQB1*03:03
DQA1*06:01/DQB1*03:01
DQA1*06:01/DQB1*03:03
DQA1*06:01/DQB1*05:01
DQA1*06:01/DQB1*05:02
*****

```

```

NETLLQOYKL KIEEDKKLLE KCDQLDLLFN VQNNLQVMYS MYDSVSNVLQ NOYKELNOKE MIYNIYKLVK KNDKLNKFLN LTANSAAASS ALPPPPSVPP AVPPASQQPQ 990
***** *
DRB1*12:02
DRB1*15:02 *
DQA1*01:01/DQB1*03:01 *****
DQA1*01:01/DQB1*03:03 *****
DQA1*01:02/DQB1*03:01 *****
DQA1*01:02/DQB1*03:03 *****
DQA1*03:02/DQB1*03:01 *****
DQA1*03:02/DQB1*03:03 *****
DQA1*06:01/DQB1*03:01 *****
DQA1*06:01/DQB1*03:03 *****
DQA1*06:01/DQB1*05:01 *****
DQA1*06:01/DQB1*05:02 *****

```

**Block VIII**

**→← Block IX**

```

FQAALPAQPPQ AAVPAQSQAT VPAQSQAAMP AITQSSSVSA PTGTINGASPA TPVAPAGSEN AIQLKANDNE DDANELDFDI DDIYIKYLEQ VSKYDENFKN FIESKKDIIN 1100
DRB1*12:02
DRB1*15:02 *****
DQA1*01:01/DQB1*03:01 *****
DQA1*01:01/DQB1*03:03 *****
DQA1*01:02/DQB1*03:01 *****
DQA1*01:02/DQB1*03:03 *****
DQA1*03:02/DQB1*03:01 *****
DQA1*03:02/DQB1*03:03 *****
DQA1*06:01/DQB1*03:01 *****
DQA1*06:01/DQB1*03:03 *****
DQA1*06:01/DQB1*05:01 *****
DQA1*06:01/DQB1*05:02 *****

```

```

KMSESEWKEL GEEINTLKQD IQSSFDNFCK YKCLKLERLLK KKNKITSSTN HIKEYSILKA QLLRKNILN NPRHLVAAFV VFFNKIEAE KKEVENALKN TDIMLKYYKA 1210
*****
DRB1*12:02
DRB1*15:02 *****
DQA1*01:01/DQB1*03:01 *****
DQA1*01:01/DQB1*03:03 *****
DQA1*01:02/DQB1*03:01 *****
DQA1*01:02/DQB1*03:03 *****
DQA1*03:02/DQB1*03:01 *****
DQA1*03:02/DQB1*03:03 *****
DQA1*06:01/DQB1*03:01 *****
DQA1*06:01/DQB1*03:03 *****
DQA1*06:01/DQB1*05:01 *****
DQA1*06:01/DQB1*05:02 *****

```

```

RIKYYISEAF PLKTITEQSL QKEINYLHLE KFKVYSRLEG RIKKMLNLEK ENITYLSGGL HHVLTTELKEI INDKTYTGYT HIKNNEEVNK ALNVYEELLP KQISTEEQPD
*****
DRB1*12:02 *****
DRB1*15:02 *****
DQA1*01:01/DQB1*03:01 *****
DQA1*01:01/DQB1*03:03 *****
DQA1*01:02/DQB1*03:01 *****
DQA1*01:02/DQB1*03:03 *****
DQA1*03:02/DQB1*03:01 *****
DQA1*03:02/DQB1*03:03 *****
DQA1*06:01/DQB1*03:01 *****
DQA1*06:01/DQB1*03:03 *****
DQA1*06:01/DQB1*05:01 *****
DQA1*06:01/DQB1*05:02 *****

```

DRB1\*12:02  
 DRB1\*15:02  
 DQAI\*01:01/DQBI\*03:01 \*\*\*\*\*  
 DQAI\*01:01/DQBI\*03:03 \*\*\*\*\*  
 DQAI\*01:02/DQBI\*03:01 \*\*\*\*\*  
 DQAI\*01:02/DQBI\*03:03 \*\*\*\*\*  
 DQAI\*03:02/DQBI\*03:01 \*\*\*\*\*  
 DQAI\*03:02/DQBI\*03:03 \*\*\*\*\*  
 DQAI\*06:01/DQBI\*03:01 \*\*\*\*\*  
 DQAI\*06:01/DQBI\*03:03 \*\*\*\*\*  
 DQAI\*06:01/DQBI\*05:01 \*\*\*\*\*  
 DQAI\*06:01/DQBI\*05:02 \*\*\*\*\*

NALADGTENA TEGAEVRAAT AESLVQGEDE YPEEVDEVIV FPIVGGKEKE NPLDQITKGQ AETKQDDNLL KPITNEYEVL YIKPLAGVYR VLRKQIGDQI DAFNSNLINA 1430  
 \*\*\*\*\*  
 \*\*\*\*\*  
 \*\*\*\*\*  
 \*\*\*\*\*  
 \*\*\*\*\*  
 \*\*\*\*\*  
 \*\*\*\*\*  
 \*\*\*\*\*  
 \*\*\*\*\*  
 \*\*\*\*\*

DRB1\*12:02  
 DRB1\*15:02  
 DQAI\*01:01/DQBI\*03:01 \*\*\*\*\*  
 DQAI\*01:01/DQBI\*03:03 \*\*\*\*\*  
 DQAI\*01:02/DQBI\*03:01 \*\*\*\*\*  
 DQAI\*01:02/DQBI\*03:03 \*\*\*\*\*  
 DQAI\*03:02/DQBI\*03:01 \*\*\*\*\*  
 DQAI\*03:02/DQBI\*03:03 \*\*\*\*\*  
 DQAI\*06:01/DQBI\*03:01 \*\*\*\*\*  
 DQAI\*06:01/DQBI\*03:03 \*\*\*\*\*  
 DQAI\*06:01/DQBI\*05:01 \*\*\*\*\*  
 DQAI\*06:01/DQBI\*05:02 \*\*\*\*\*

LDTRKKKRTY FLDVLSNDLI QFKHATSDSY IIKDPYKLLD VDKKAKLIGS YKYIVSAIEK DITSAENGVE YYDKMTKLYK TQLEAVKSAI AEAQKEGDKK TENEKYIPFL 1540  
 \*\*\*\*\*  
 \*\*\*\*\*  
 \*\*\*\*\*  
 \*\*\*\*\*  
 \*\*\*\*\*  
 \*\*\*\*\*  
 \*\*\*\*\*  
 \*\*\*\*\*  
 \*\*\*\*\*  
 \*\*\*\*\*

DRB1\*12:02  
 DRB1\*15:02  
 DQAI\*01:01/DQBI\*03:01 \*\*\*\*\*  
 DQAI\*01:01/DQBI\*03:03 \*\*\*\*\*  
 DQAI\*01:02/DQBI\*03:01 \*\*\*\*\*  
 DQAI\*01:02/DQBI\*03:03 \*\*\*\*\*  
 DQAI\*03:02/DQBI\*03:01 \*\*\*\*\*  
 DQAI\*03:02/DQBI\*03:03 \*\*\*\*\*  
 DQAI\*06:01/DQBI\*03:01 \*\*\*\*\*  
 DQAI\*06:01/DQBI\*03:03 \*\*\*\*\*  
 DQAI\*06:01/DQBI\*05:01 \*\*\*\*\*  
 DQAI\*06:01/DQBI\*05:02 \*\*\*\*\*

TNMQTLYENL LNKINGNIIN LKTLITNCNL EKDAVNITIS KLTEYSKFDE KIEMFKNSKN EKDIASSGIL DILKQKGLVN KNESTKIISE LLGVDSNALL NISAKHACTE 1650  
 \*\*\*\*\*  
 \*\*\*\*\*  
 \*\*\*\*\*  
 \*\*\*\*\*  
 \*\*\*\*\*  
 \*\*\*\*\*  
 \*\*\*\*\*  
 \*\*\*\*\*  
 \*\*\*\*\*  
 \*\*\*\*\*

DRB1\*12:02  
 DRB1\*15:02  
 DQAI\*01:01/DQBI\*03:01 \*\*\*\*\*  
 DQAI\*01:01/DQBI\*03:03 \*\*\*\*\*  
 DQAI\*01:02/DQBI\*03:01 \*\*\*\*\*  
 DQAI\*01:02/DQBI\*03:03 \*\*\*\*\*  
 DQAI\*03:02/DQBI\*03:01 \*\*\*\*\*  
 DQAI\*03:02/DQBI\*03:03 \*\*\*\*\*  
 DQAI\*06:01/DQBI\*03:01 \*\*\*\*\*  
 DQAI\*06:01/DQBI\*03:03 \*\*\*\*\*  
 DQAI\*06:01/DQBI\*05:01 \*\*\*\*\*  
 DQAI\*06:01/DQBI\*05:02 \*\*\*\*\*

TKYPENAGCY RYEDGKEVWR CLLNYKLVGD GCVDEEPPSC QVNNGGCAPE ANCTKGDDNK IVCACNAPYS EPIFEGVFCG SSSFLGLSLL LAALLIMFNL L 1751  
 \*\*\*\*\*  
 \*\*\*\*\*  
 \*\*\*\*\*  
 \*\*\*\*\*  
 \*\*\*\*\*  
 \*\*\*\*\*  
 \*\*\*\*\*  
 \*\*\*\*\*  
 \*\*\*\*\*  
 \*\*\*\*\*



**Supplemental Figure S3.** Schematic representation of malarial MSP1s, depicting homologous regions (broken lines) across *Plasmodium* species. Open and filled boxes are conserved sequences and variable non-repeat regions within each locus. Boxes with checkerboard, horizontal brick, solid diamond and horizontal line are repeat regions. The schemes are drawn in approximate proportion to the gene length.

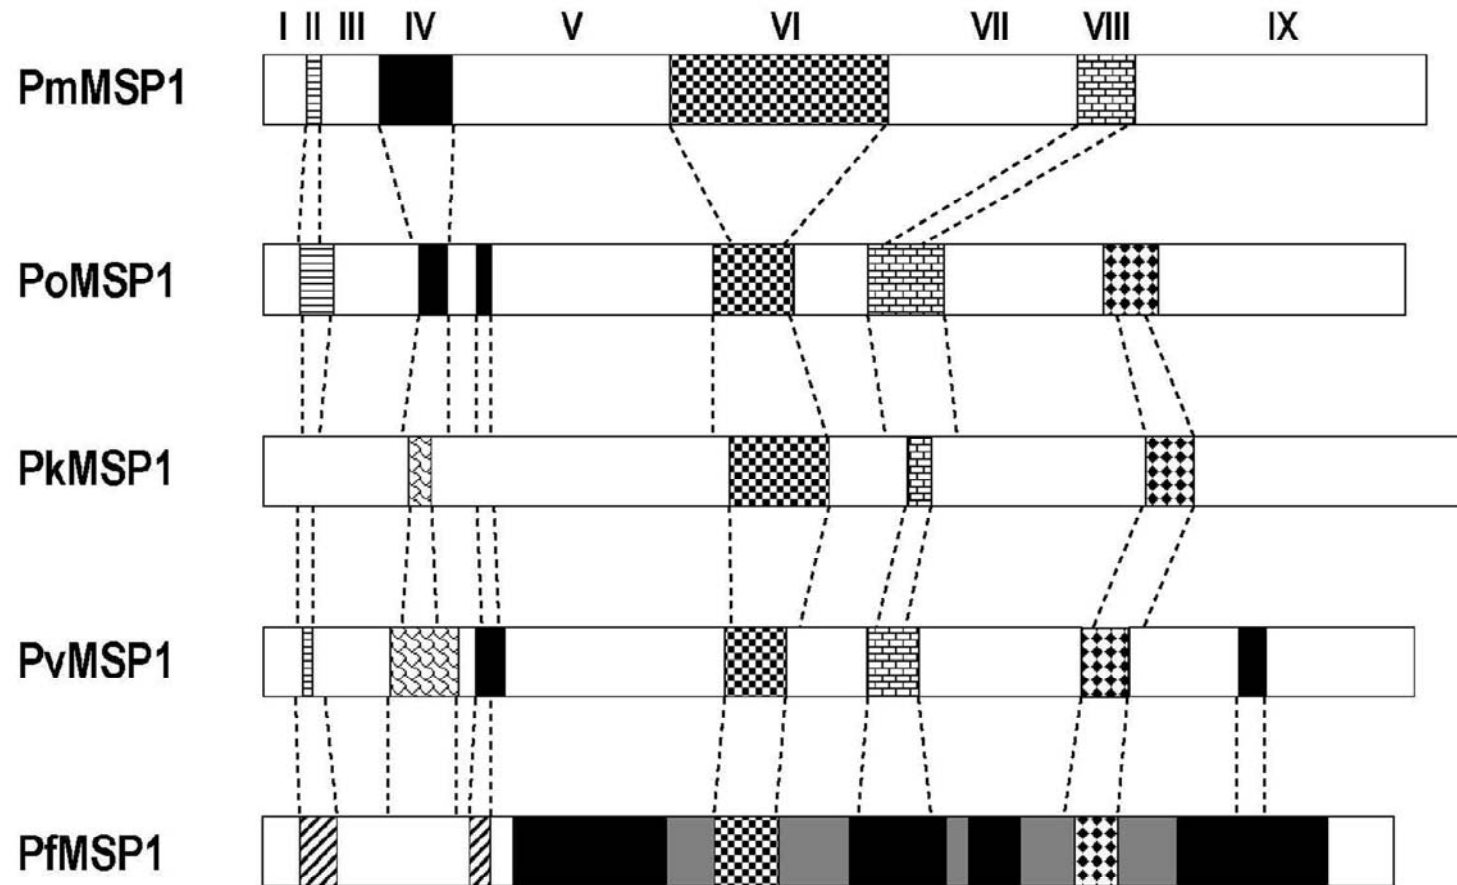

Supplement: 41598_2022_19049_MOESM1_ESM.pdf [file 41598_2022_19049_MOESM1_ESM.pdf]
